# Supplementary material
Source: MDPI journal article supplement (https://www.mdpi.com/2073-4395/14/3/640)
Supplement: s1 [file s1]

**Table S1:** Species recorded in the study sites, frequencies of occurrence, means and standard deviations (SD).

| Region | Weed species                   | EPPO code | Frequency (%) | Mean  | SD    |
|--------|--------------------------------|-----------|---------------|-------|-------|
| Chora  | <i>Aegilops triuncialis</i>    | AEGTR     | 2.78          | 0.14  | 0.83  |
|        | <i>Alopecurus myosuroides</i>  | ALOMY     | 13.89         | 1.33  | 3.92  |
|        | <i>Anagallis arvensis</i>      | ANGAR     | 16.67         | 0.59  | 1.41  |
|        | <i>Anthemis arvensis</i>       | ANTAR     | 63.89         | 6.27  | 7.37  |
|        | <i>Avena</i> spp.              | AVESS     | 38.89         | 4.09  | 7.37  |
|        | <i>Brachypodium distachyon</i> | BRCDI     | 25.00         | 2.44  | 5.45  |
|        | <i>Bromus</i> spp.             | BROSS     | 55.56         | 10.25 | 11.89 |
|        | <i>Briza minima</i>            | BRZMI     | 5.56          | 0.75  | 3.72  |
|        | <i>Capsella bursa-pastoris</i> | CAPBP     | 8.33          | 0.27  | 1.02  |
|        | <i>Carthamus tinctorius</i>    | CAUTI     | 2.78          | 0.21  | 1.25  |
|        | <i>Cerinthe major</i>          | CEHMA     | 5.56          | 0.46  | 2.05  |
|        | <i>Cerastium glomeratum</i>    | CERGL     | 2.78          | 0.12  | 0.70  |
|        | <i>Chrysanthemum segetum</i>   | CHYSE     | 13.89         | 1.00  | 2.66  |
|        | <i>Cirsium arvense</i>         | CIRAR     | 8.33          | 1.09  | 4.26  |
|        | <i>Calendula arvensis</i>      | CLDAR     | 69.44         | 7.23  | 8.37  |
|        | <i>Consolida regalis</i>       | CNSRE     | 8.33          | 0.28  | 1.12  |
|        | <i>Convolvulus althaeoides</i> | CONAL     | 2.78          | 0.07  | 0.42  |
|        | <i>Cynosurus echinatus</i>     | CYXEC     | 8.33          | 0.31  | 1.17  |
|        | <i>Cyclamen</i> spp.           | CYZSS     | 2.78          | 0.07  | 0.42  |
|        | <i>Dactylis glomerata</i>      | DACGL     | 2.78          | 0.17  | 1.04  |
|        | <i>Dracunculus vulgaris</i>    | DCUVU     | 2.78          | 0.20  | 1.23  |
|        | <i>Erigeron canadensis</i>     | ERICA     | 8.33          | 1.72  | 3.37  |
|        | <i>Erodium malacoides</i>      | EROMC     | 27.78         | 1.04  | 4.97  |
|        | <i>Eryngium campestre</i>      | ERXCA     | 5.56          | 1.48  | 3.34  |
|        | <i>Euphorbia helioscopia</i>   | EPHHE     | 27.78         | 0.59  | 3.14  |
|        | <i>Filago eriocephala</i>      | FILER     | 2.78          | 0.20  | 1.19  |
|        | <i>Foeniculum vulgare</i>      | FOEVU     | 8.33          | 0.62  | 2.45  |
|        | <i>Galium aparine</i>          | GALAP     | 8.33          | 0.25  | 0.94  |
|        | <i>Galactites tomentosus</i>   | GCTTO     | 2.78          | 0.09  | 0.56  |
|        | <i>Geranium</i> spp.           | GERSS     | 38.89         | 3.96  | 6.17  |
|        | <i>Hordeum murinum</i>         | HORMU     | 5.56          | 0.16  | 0.76  |
|        | <i>Hypochaeris radicata</i>    | HRYRA     | 2.78          | 0.07  | 0.44  |
|        | <i>Imperata cylindrica</i>     | IMPCY     | 2.78          | 0.14  | 0.83  |
|        | <i>Lamium</i> spp.             | LAMSS     | 22.22         | 1.87  | 4.74  |
|        | <i>Lolium</i> spp.             | LOLSS     | 25.00         | 2.18  | 4.02  |
|        | <i>Malva sylvestris</i>        | MALSS     | 41.67         | 7.58  | 13.53 |
|        | <i>Medicago</i> spp.           | MEDSS     | 38.89         | 5.00  | 7.64  |
|        | <i>Mentha suaveolens</i>       | MENSU     | 2.78          | 0.03  | 0.21  |
|        | <i>Mercurialis annua</i>       | MERAN     | 33.33         | 3.34  | 8.68  |
|        | <i>Muscari commutatum</i>      | MUSCM     | 5.56          | 0.11  | 0.48  |
|        | <i>Ononis ornithopodioides</i> | ONOOR     | 11.11         | 0.57  | 1.72  |
|        | <i>Ornithopus compressus</i>   | OROCO     | 2.78          | 0.42  | 2.50  |
|        | <i>Oloptum miliaceum</i>       | ORZMI     | 2.78          | 0.25  | 1.51  |
|        | <i>Ornithogalum umbellatum</i> | OTGUM     | 2.78          | 0.42  | 2.50  |
|        | <i>Oxalis pes-caprae</i>       | OXAPC     | 50.00         | 9.50  | 14.00 |

|      |                                |       |       |      |       |
|------|--------------------------------|-------|-------|------|-------|
|      | <i>Parietaria officinalis</i>  | PAIOF | 11.11 | 1.35 | 5.06  |
|      | <i>Papaver rhoeas</i>          | PAPRH | 8.33  | 0.52 | 2.72  |
|      | <i>Phalaris minor</i>          | PHAMI | 2.78  | 0.14 | 0.83  |
|      | <i>Picris echioides</i>        | PICEC | 8.33  | 1.63 | 7.40  |
|      | <i>Pallenis spinosa</i>        | PNSSP | 2.78  | 0.07 | 0.42  |
|      | <i>Ranunculus sardous</i>      | RANSA | 11.11 | 1.22 | 3.68  |
|      | <i>Raphanus raphanistrum</i>   | RAPRA | 11.11 | 1.31 | 5.70  |
|      | <i>Rapistrum rugosum</i>       | RASRU | 2.78  | 0.49 | 2.92  |
|      | <i>Rumex spp.</i>              | RUMSS | 13.89 | 1.23 | 3.63  |
|      | <i>Scabiosa atropurpurea</i>   | SCBAT | 8.33  | 1.06 | 3.66  |
|      | <i>Desmazeria rigida</i>       | SCCRI | 5.56  | 0.49 | 2.22  |
|      | <i>Sherardia arvensis</i>      | SHRAR | 11.11 | 0.49 | 1.53  |
|      | <i>Silene colorata</i>         | SILCO | 2.78  | 0.04 | 0.23  |
|      | <i>Sinapis alba</i>            | SINAL | 13.89 | 0.78 | 2.38  |
|      | <i>Silybum marianum</i>        | SLYMA | 11.11 | 0.80 | 3.57  |
|      | <i>Sonchus spp.</i>            | SONSS | 19.44 | 1.28 | 3.81  |
|      | <i>Stellaria media</i>         | STEME | 2.78  | 0.10 | 0.63  |
|      | <i>Taraxacum officinale</i>    | TAROF | 2.78  | 0.17 | 1.04  |
|      | <i>Tordylium apulum</i>        | TORAP | 16.67 | 1.40 | 3.50  |
|      | <i>Trifolium spp.</i>          | TRFSS | 19.44 | 1.13 | 3.05  |
|      | <i>Trigonella corniculata</i>  | TRKCO | 8.33  | 1.40 | 5.52  |
|      | <i>Tragopogon spp.</i>         | TROSS | 5.56  | 0.39 | 1.92  |
|      | <i>Veronica arvensis</i>       | VERAR | 16.67 | 0.49 | 1.26  |
|      | <i>Vicia spp.</i>              | VICSS | 27.78 | 2.37 | 5.29  |
|      | <i>Vulpia myuros</i>           | VLPMY | 2.78  | 0.45 | 2.71  |
| Peza | <i>Agrostemma spp.</i>         | AGOSS | 2.50  | 0.19 | 1.19  |
|      | <i>Allium spp.</i>             | ALLSS | 7.50  | 0.53 | 1.98  |
|      | <i>Anagallis arvensis</i>      | ANGSS | 10.00 | 0.63 | 2.21  |
|      | <i>Anthemis arvensis</i>       | ANTAR | 2.50  | 0.28 | 1.78  |
|      | <i>Asparagus verticulatus</i>  | ASPVE | 2.50  | 0.09 | 0.59  |
|      | <i>Avena spp.</i>              | AVESS | 50.00 | 5.16 | 7.28  |
|      | <i>Bromus spp.</i>             | BROSS | 52.50 | 7.94 | 12.87 |
|      | <i>Calendula arvensis</i>      | CLDAR | 12.50 | 0.91 | 2.69  |
|      | <i>Convolvulus arvensis</i>    | CONSS | 12.50 | 0.66 | 1.90  |
|      | <i>Dracunculus vulgaris</i>    | DCUVU | 5.00  | 0.31 | 1.41  |
|      | <i>Erodium spp.</i>            | EROSS | 20.00 | 1.16 | 2.72  |
|      | <i>Euphorbia helioscopia</i>   | EPHSS | 32.50 | 1.66 | 3.79  |
|      | <i>Fumaria officinalis</i>     | FUMOF | 5.00  | 0.22 | 1.20  |
|      | <i>Galium aparine</i>          | GALAP | 10.00 | 0.19 | 0.67  |
|      | <i>Geranium spp.</i>           | GERSS | 2.50  | 0.09 | 0.59  |
|      | <i>Gladiolus italicus</i>      | GLAIT | 2.50  | 0.25 | 1.58  |
|      | <i>Hordeum murinum</i>         | HORSS | 7.50  | 0.75 | 2.68  |
|      | <i>Lamium bifidum</i>          | LAMBI | 5.00  | 1.06 | 4.70  |
|      | <i>Lolium spp.</i>             | LOLSS | 10.00 | 0.66 | 2.14  |
|      | <i>Malva sylvestris</i>        | MALSS | 17.50 | 2.28 | 6.12  |
|      | <i>Medicago polymorpha</i>     | MEDSS | 30.00 | 2.88 | 6.20  |
|      | <i>Mercurialis annua</i>       | MERAN | 5.00  | 0.22 | 1.20  |
|      | <i>Oenanthe pimpinelloides</i> | OENPI | 2.50  | 0.06 | 0.40  |

|            |                               |       |       |       |       |
|------------|-------------------------------|-------|-------|-------|-------|
|            | <i>Orobancha ramosa</i>       | ORARA | 45.00 | 1.34  | 2.09  |
|            | <i>Oxalis pes-caprae</i>      | OXAPC | 92.50 | 35.16 | 19.63 |
|            | <i>Papaver rhoeas</i>         | PAPRH | 2.50  | 0.13  | 0.79  |
|            | <i>Parietaria officinalis</i> | PAIOF | 2.50  | 0.13  | 0.79  |
|            | <i>Oloptum miliaceum</i>      | ORZMI | 15.00 | 1.25  | 3.30  |
|            | <i>Raphanus raphanistrum</i>  | RAPRA | 2.50  | 0.13  | 0.79  |
|            | <i>Rubus</i> spp.             | RUBSS | 2.50  | 0.09  | 0.59  |
|            | <i>Satureja thymbra</i>       | STITI | 2.50  | 1.25  | 7.91  |
|            | <i>Sinapis</i> spp.           | SINSS | 30.00 | 2.59  | 5.20  |
|            | <i>Sonchus oleraceus</i>      | SONOL | 12.50 | 0.53  | 1.88  |
|            | <i>Taraxacum officinale</i>   | TAROF | 5.00  | 1.88  | 11.08 |
|            | <i>Tordylium apulum</i>       | TORAP | 2.50  | 0.09  | 0.59  |
|            | <i>Trifolium repens</i>       | TRFSS | 10.00 | 0.84  | 2.85  |
|            | <i>Vicia</i> spp.             | VICSS | 10.00 | 0.72  | 2.26  |
| Meramvello | <i>Allium</i> spp.            | ALLSS | 10.00 | 0.94  | 4.07  |
|            | <i>Anthemis arvensis</i>      | ANTAR | 7.50  | 0.75  | 3.05  |
|            | <i>Asparagus verticulatus</i> | ASPVE | 5.00  | 0.47  | 2.59  |
|            | <i>Asphodelus luteus</i>      | APNLU | 2.50  | 0.63  | 3.95  |
|            | <i>Avena</i> spp.             | AVESS | 37.50 | 4.88  | 7.87  |
|            | <i>Bromus</i> spp.            | BROSS | 27.50 | 4.59  | 11.49 |
|            | <i>Calendula arvensis</i>     | CLDAR | 2.50  | 0.06  | 0.40  |
|            | <i>Carduus</i> spp.           | CRUSS | 17.50 | 0.59  | 1.41  |
|            | <i>Chrysanthemum segetum</i>  | CHYSE | 2.50  | 0.16  | 0.99  |
|            | <i>Cistus creticus</i>        | CSTIC | 5.00  | 0.75  | 3.50  |
|            | <i>Cynodon dactylon</i>       | CYNDA | 5.00  | 0.56  | 2.62  |
|            | <i>Dracunculus vulgaris</i>   | DCUVU | 10.00 | 1.03  | 4.01  |
|            | <i>Drimia maritima</i>        | URGMA | 2.50  | 0.31  | 1.98  |
|            | <i>Euphorbia</i> spp.         | EPHSS | 2.50  | 0.63  | 3.95  |
|            | <i>Ferula communis</i>        | FERCO | 25.00 | 2.31  | 4.62  |
|            | <i>Galactites tomentosa</i>   | GCTTO | 7.50  | 0.63  | 2.32  |
|            | <i>Galium aparine</i>         | GALAP | 7.50  | 0.63  | 3.37  |
|            | <i>Gladiolus italicus</i>     | GLAIT | 7.50  | 0.47  | 1.69  |
|            | <i>Glechoma hederacea</i>     | GLEHE | 2.50  | 0.19  | 1.19  |
|            | <i>Hordeum</i> spp.           | HORSS | 15.00 | 1.91  | 4.99  |
|            | <i>Lolium</i> spp.            | LOLSS | 2.50  | 0.13  | 0.79  |
|            | <i>Lotus ornithopodioides</i> | LOTOR | 2.50  | 0.63  | 3.95  |
|            | <i>Malva sylvestris</i>       | MALSS | 15.00 | 1.03  | 2.74  |
|            | <i>Medicago</i> spp.          | MEDSS | 40.00 | 3.97  | 6.24  |
|            | <i>Mercurialis annua</i>      | MERAN | 2.50  | 0.75  | 4.74  |
|            | <i>Orobancha ramosa</i>       | ORARA | 32.50 | 0.91  | 1.88  |
|            | <i>Oxalis pes-caprae</i>      | OXAPC | 92.50 | 40.19 | 23.19 |
|            | <i>Oloptum miliaceum</i>      | ORZMI | 10.00 | 1.06  | 3.74  |
|            | <i>Psoralea bituminosa</i>    | PSRBI | 2.50  | 0.56  | 3.56  |
|            | <i>Raphanus raphanistrum</i>  | RAPRA | 2.50  | 0.09  | 0.59  |
|            | <i>Rhagadiolus stellatus</i>  | RHGST | 2.50  | 0.13  | 0.79  |
|            | <i>Rumex</i> spp.             | RUMSS | 5.00  | 0.31  | 1.41  |
|            | <i>Sarcopoterium spinosum</i> | SRCSP | 2.50  | 0.19  | 1.19  |
|            | <i>Satureja thymbra</i>       | STITH | 2.50  | 0.44  | 2.77  |

|                             |       |       |      |      |
|-----------------------------|-------|-------|------|------|
| <i>Sinapis alba</i>         | SINAL | 2.50  | 0.19 | 1.19 |
| <i>Smyrniurn olusatrum</i>  | SMYOL | 2.50  | 0.31 | 1.98 |
| <i>Sonchus oleraceus</i>    | SONOL | 10.00 | 0.47 | 1.62 |
| <i>Taraxacum officinale</i> | TAROF | 17.50 | 1.57 | 3.89 |
| <i>Tordylium apulum</i>     | TORAP | 22.50 | 1.72 | 3.67 |
| <i>Torilis nodosa</i>       | TOINO | 5.00  | 0.56 | 2.86 |
| <i>Trifolium repens</i>     | TRFSS | 7.50  | 0.59 | 2.37 |
| <i>Vicia spp.</i>           | VICSS | 40.0  | 4.41 | 8.09 |

---
